# Supplementary material for: Visible light-mediated ring-opening polymerization of lactones based on the excited state acidity of ESPT molecules
Source: Royal Society of Chemistry journal article supplement (doi:10.1039/d0py00369g), 2020-01-01
Supplement: d0py00369g1.pdf [file d0py00369g1.pdf]

## Supporting information

*For*

### **Visible light-induced ring-opening polymerization of lactones based on the excited state acidity of ESPT molecules**

Xun Zhang,<sup>a</sup> Qiang Ma,<sup>a</sup> Siping Hu,<sup>a</sup> and Saihu Liao<sup>\*a,b</sup>

<sup>a</sup> Key Laboratory of Molecule Synthesis and Function Discovery, College of Chemistry, Fuzhou University, Fuzhou 350116, P. R. China;

E-mail:shliao@fzu.edu.cn

<sup>b</sup> Beijing National Laboratory for Molecular Sciences, Fuzhou University, Fuzhou 350116, P. R. China

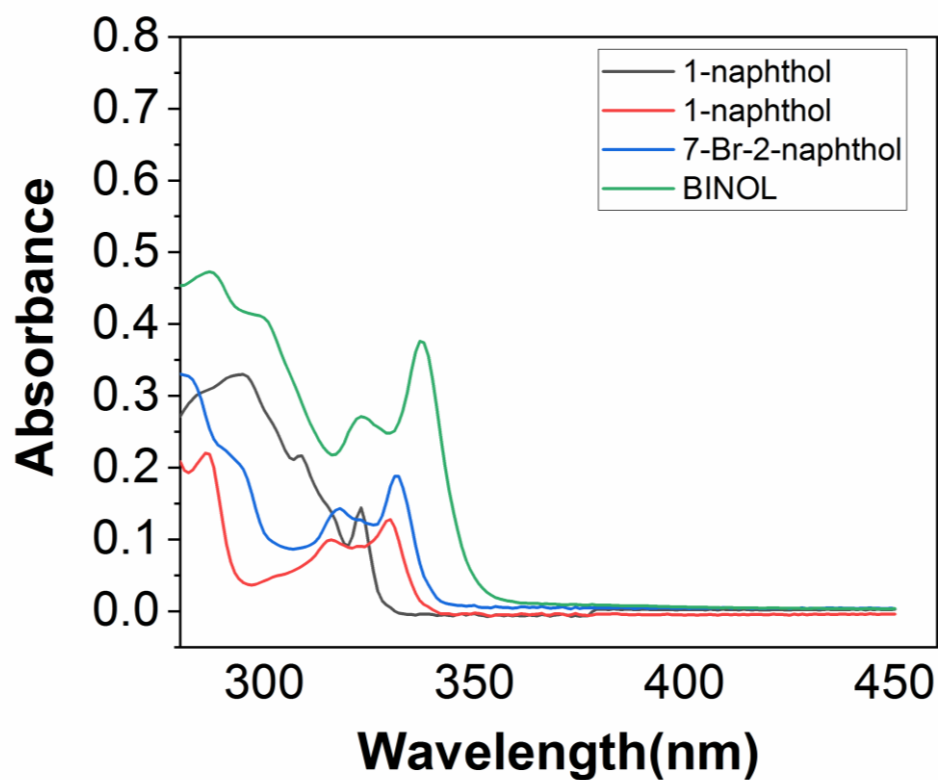

**Figure S1.** UV-Vis spectra of a  $5 \times 10^{-5}$  M 1-naphthol, 2-naphthol, 7-Bromo-2-naphthol and 2,2'-dihydroxy-1,1'-binaphthyl (BINOL)

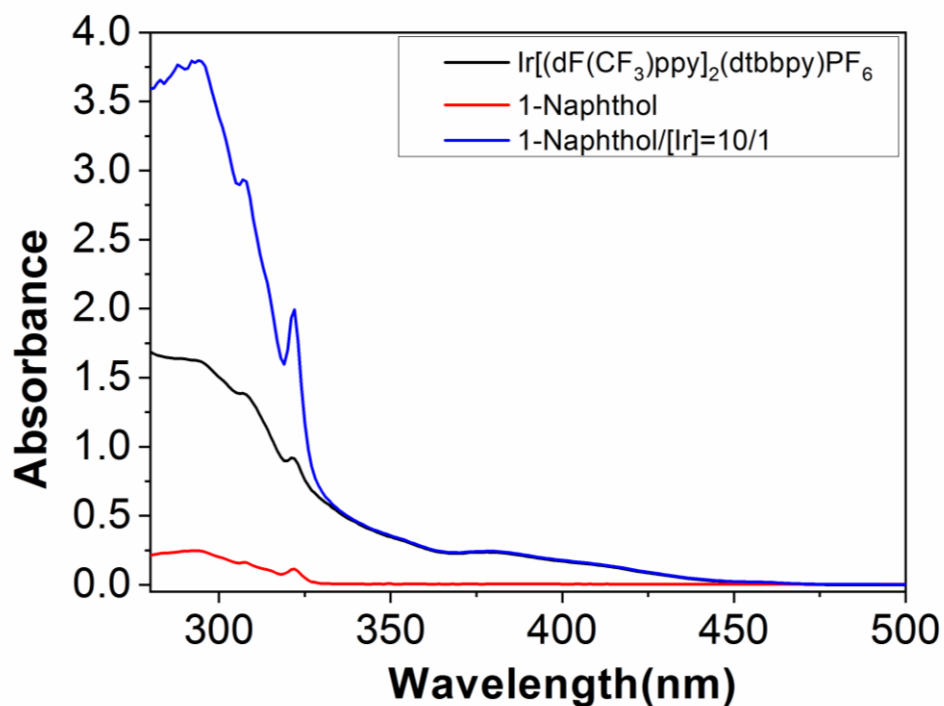

**Figure S2.** UV-Vis spectra of a  $5 \times 10^{-5}$  M  $\text{Ir}[(\text{dF}(\text{CF}_3)\text{ppy})_2(\text{dtbbpy})]\text{PF}_6$  (SENS 5), 1-naphthol, and 1-naphthol/ SENS 5=10/1 in DCM.

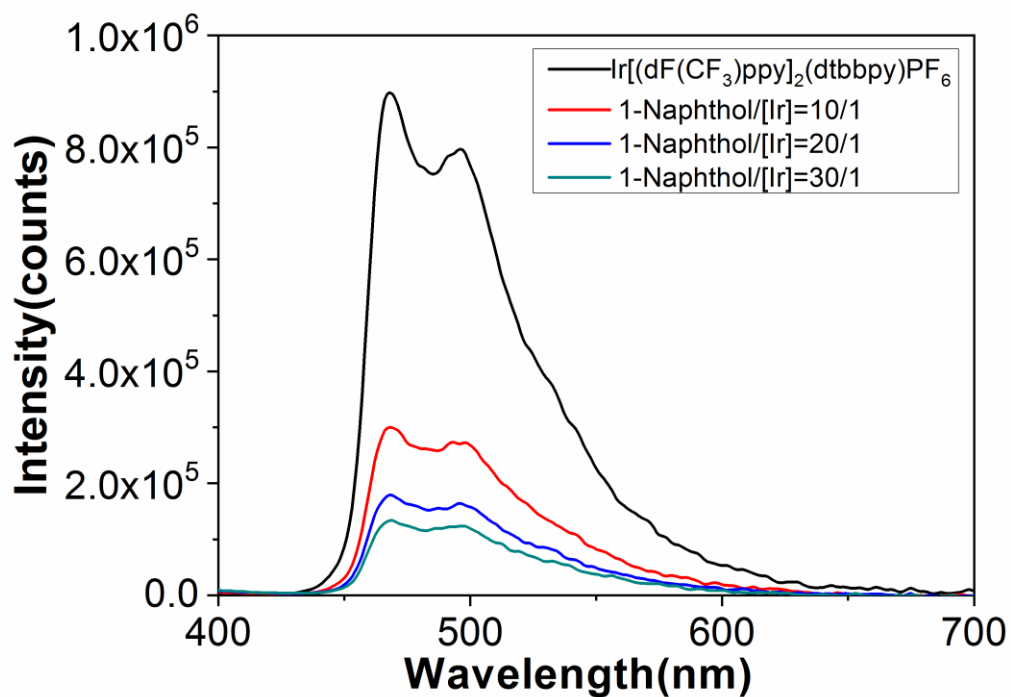

**Figure S3.** Emission spectra of Ir[(dF(CF<sub>3</sub>)ppy)<sub>2</sub>(dtbbpy)]PF<sub>6</sub> (**SENS 5**), and fluorescence titration with 10 equivalents, 20 equivalents, 30 equivalents of 1-naphthol.

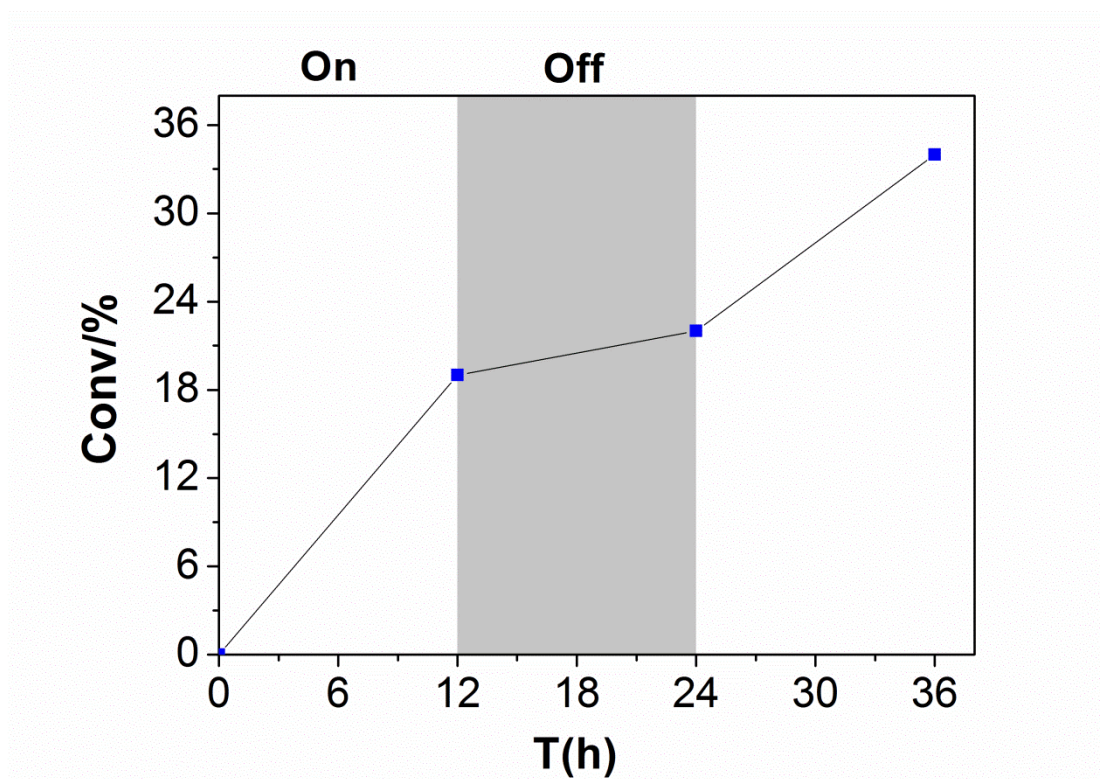

**Figure S4.** Light On-Off experiment:  $[\delta\text{-VL}]_0/[\text{PPA}]_0/[\text{NPOH}]_0/[\text{fac-Ir}(\text{ppy})_3]_0 = 50/1/1/0.1$ .

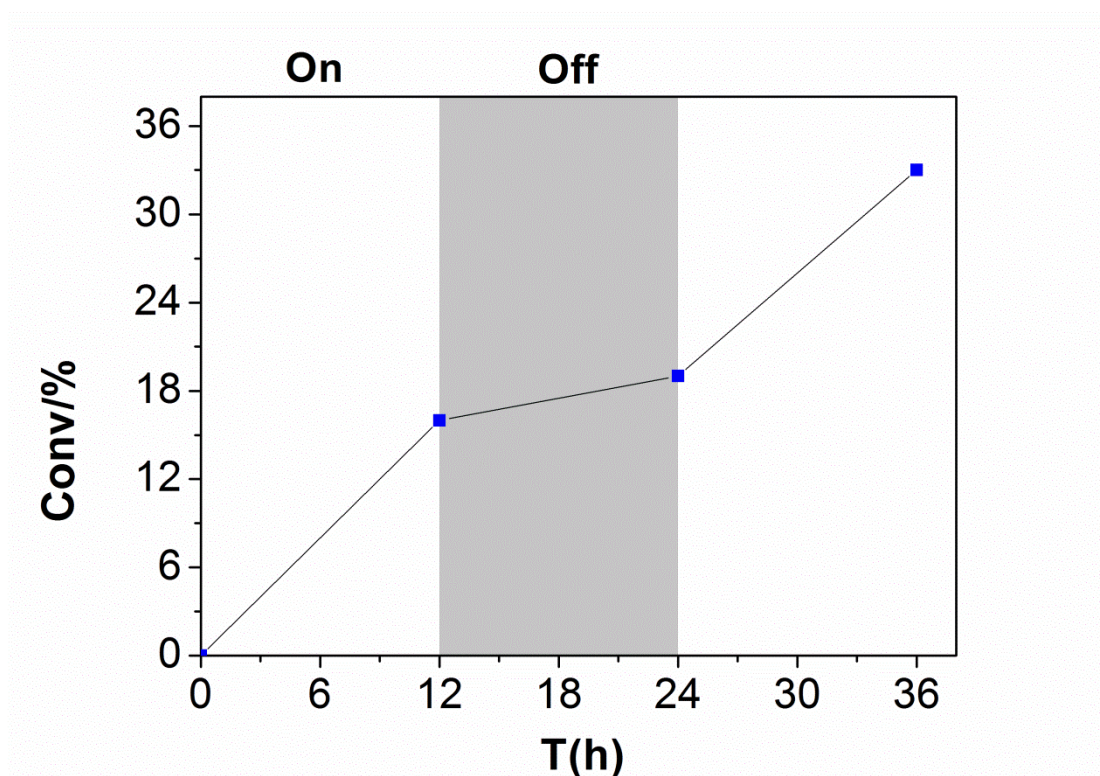

**Figure S5.** Light On-Off experiment:  $[\delta\text{-VL}]_0/[\text{PPA}]_0/[\text{2-naphthol}]_0/[\text{fac-Ir(ppy)}_3]_0 = 50/1/1/0.1$ .

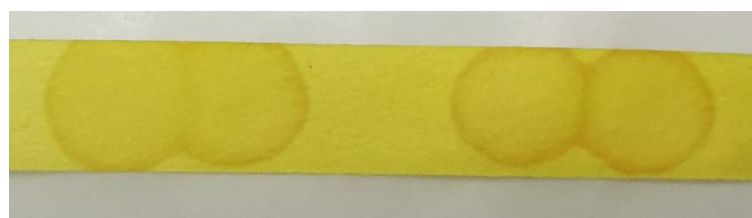

**Left**

**Right**

**Figure S6.** The pH change of NPOH in EtOH/H<sub>2</sub>O (v/v 1:1, 0.1M) before (left) and after (right) light irradiation for 4 hours.
